# Supplementary material for: Gut microbiota dynamics in a prospective cohort of patients with post-acute COVID-19 syndrome
Source: HighWire-hosted journal article supplement (doi:10.1136/gutjnl-2021-325989), 2022-01-26
Supplement: gutjnl-2021-325989supp002_data_supplement.xlsx [file gutjnl-2021-325989supp002_data_supplement.xlsx]

## Sheet: Sheet1
	Breakfast	Lunch	Dinner
Monday	Low Sweeten Oat meal+biscuit/bread	Fish Fillet w/ Bean paste	Chicken in Hungary Style
Tuesday	Dried scallop w/ Chicken + mushroom slices congee + biscuit/bread	Sliced Beef w/ Black beans + greencapcsium Sauce	Chicken Wing Marinated in Kapurkachli Ground
Wednesday	Shredded Pork + Chinese CabbageMacaroni+biscuit/bread	Beancurd w/ Braised Meat	Chicken Thigh w/ Toasted garlic gravy
Thursday	Low Sweeten Oat meal+biscuit/bread	Steamed Minced Pork in ChineseMushroom, Water Chestnut + Oat	Chicken Wing w/ Soya Sauce
Friday	Preserved vegetable w/ Pork slicesCongee+biscuit/bread	Fish Fillet w/ Mixed mushroom + vegetrain oyster sauce + Fish Fillet w/Tomato concassie	Pork Cube w/ Pumpkin in Black BeanSauce
Saturday	Shredded Chicken + Pak ChoiMacaroni+biscuit/bread	Chicken w/ Onion slices + pumpkinSauce	Pork w/ Preserved Vegetable + Chinese Mushroom Sauce
Sunday	Low Sweeten Oat meal + biscuit/bread	Pork Cube w/ Garlic + Black BeanSauce	Braised beeef bisket w/ mild curry + coconut milk sauce
