# Supplementary material for: Gut microbiota dynamics in a prospective cohort of patients with post-acute COVID-19 syndrome
Source: HighWire-hosted journal article supplement (doi:10.1136/gutjnl-2021-325989), 2022-01-26
Supplement: gutjnl-2021-325989supp006_data_supplement.xlsx [file gutjnl-2021-325989supp006_data_supplement.xlsx]

## Sheet: Sheet1
Collection time and label name of stool samples collected from 68 COVID-19 patients at admission, 3 months, 6 months and 9 months after virus clearance.
Patients	At Admission	Month 1	Month 6	Month 9
COV1	AC1	M1C1	M6C1	M9C1
COV2	AC2	M1C2	M6C2
COV3		M1C3	M6C3
COV4	AC4	M1C4	M6C4
COV5	AC5	M1C5	M6C5
COV6	AC6	M1C6	M6C6
COV7	AC7		M6C7
COV8		M1C8	M6C8
COV9	AC9		M6C9
COV10	AC10	M1C10	M6C10
COV11	AC11	M1C11	M6C11
COV12		M1C12	M6C12
COV13	AC13	M1C13	M6C13
COV14		M1C14	M6C14	M9C14
COV15	AC15	M1C15	M6C15	M9C15
COV16		M1C16	M6C16
COV17		M1C17	M6C17
COV18	AC18	M1C18	M6C18
COV19		M1C19	M6C19	M9C19
COV20		M1C20	M6C20
COV21		M1C21	M6C21
COV22	AC22	M1C22	M6C22	M9C22
COV23	AC23	M1C23	M6C23
COV24	AC24	M1C24	M6C24
COV25	AC25	M1C25	M6C25
COV26	AC26	M1C26	M6C26
COV27		M1C27	M6C27
COV28	AC28	M1C28	M6C28	M9C28
COV29	AC29	M1C29	M6C29	M9C29
COV30	AC30	M1C30	M6C30	M9C30
COV31		M1C31	M6C31
COV32	AC32	M1C32	M6C32
COV33	AC33	M1C33	M6C33
COV34	AC34	M1C34	M6C34
COV35	AC35	M1C35	M6C35
COV36	AC36		M6C36	M9C36
COV37	AC37	M1C37	M6C37
COV38	AC38	M1C38	M6C38
COV39	AC39	M1C39	M6C39
COV40		M1C40	M6C40
COV41	AC41	M1C41	M6C41
COV42	AC42	M1C42	M6C42
COV43	AC43	M1C43	M6C43
COV44	AC44	M1C44	M6C44
COV45	AC45	M1C45	M6C45
COV46	AC46	M1C46	M6C46
COV47	AC47	M1C47	M6C47
COV48		M1C48	M6C48
COV49	AC49	M1C49	M6C49
COV50	AC50	M1C50	M6C50
COV51	AC51	M1C51	M6C51
COV52	AC52		M6C52
COV53		M1C53	M6C53	M9C53
COV54		M1C54	M6C54
COV55	AC55	M1C55	M6C55
COV56		M1C56	M6C56
COV57			M6C57
COV58	AC58	M1C58	M6C58
COV59	AC59	M1C59	M6C59
COV60		M1C60	M6C60	M9C60
COV61	AC61	M1C61	M6C61
COV62	AC62	M1C62	M6C62
COV63	AC63	M1C63	M6C63
COV64	AC64	M1C64	M6C64
COV65		M1C65	M6C65
COV66		M1C66	M6C66
COV67		M1C67	M6C67
COV68		M1C68	M6C68
