# Supplementary material for: Gut microbiota dynamics in a prospective cohort of patients with post-acute COVID-19 syndrome
Source: HighWire-hosted journal article supplement (doi:10.1136/gutjnl-2021-325989), 2022-01-26
Supplement: gutjnl-2021-325989supp009_data_supplement.xlsx [file gutjnl-2021-325989supp009_data_supplement.xlsx]

## Sheet: phylum
phylum	ra	group	LDA	p	FDR
k__Bacteria_p__Fusobacteria	3.07414	PACS, Baseline at admission	2.71946	4.35692e-06	0.000476112
k__Bacteria_p__Bacteroidetes	4.63835	PACS, Baseline at admission	4.04065	0.000589588	0.0157032
k__Bacteria_p__Actinobacteria	4.62056	Non-COVID-19 controls	3.83994	0.0119145	0.136954
k__Bacteria_p__Firmicutes	4.86149	Non-COVID-19 controls	3.83947	0.0185044	0.185384

## Sheet: class
class	ra	group	LDA	p	FDR
k__Bacteria_p__Fusobacteria_c__Fusobacteriia	3.07414	PACS, Baseline at admission	2.70827	4.35692e-06	0.000476112
k__Bacteria_p__Bacteroidetes_c__Bacteroidia	4.63835	PACS, Baseline at admission	4.04065	0.000589588	0.0157032
k__Bacteria_p__Firmicutes_c__Firmicutes_unclassified	3.06396	Non-COVID-19 controls	2.45606	0.00128847	0.0260558
k__Bacteria_p__Actinobacteria_c__Coriobacteriia	4.14518	Non-COVID-19 controls	3.52572	0.00364647	0.0560837
k__Bacteria_p__Firmicutes_c__Clostridia	4.80257	Non-COVID-19 controls	3.87781	0.0093222	0.113824
k__Bacteria_p__Firmicutes_c__Erysipelotrichia	3.15886	PACS, Baseline at admission	2.66389	0.0176221	0.178179
k__Bacteria_p__Firmicutes_c__Negativicutes	3.64871	Non-COVID-19 controls	2.93723	0.0335872	0.293418

## Sheet: order
order	ra	group	LDA	p	FDR
k__Bacteria_p__Fusobacteria_c__Fusobacteriia_o__Fusobacteriales	3.07414	PACS, Baseline at admission	2.69261	4.35692e-06	0.000476112
k__Bacteria_p__Bacteroidetes_c__Bacteroidia_o__Bacteroidales	4.63835	PACS, Baseline at admission	4.04065	0.000589588	0.0157032
k__Bacteria_p__Firmicutes_c__Firmicutes_unclassified_o__Firmicutes_unclassified	3.06396	Non-COVID-19 controls	2.45606	0.00128847	0.0260558
k__Bacteria_p__Actinobacteria_c__Coriobacteriia_o__Coriobacteriales	4.05102	Non-COVID-19 controls	3.48045	0.00739917	0.0973481
k__Bacteria_p__Firmicutes_c__Clostridia_o__Clostridiales	4.80257	Non-COVID-19 controls	3.87781	0.0093222	0.113824
k__Bacteria_p__Actinobacteria_c__Actinobacteria_o__Actinomycetales	3.17816	PACS, Baseline at admission	2.79848	0.0111664	0.12972
k__Bacteria_p__Firmicutes_c__Erysipelotrichia_o__Erysipelotrichales	3.15886	PACS, Baseline at admission	2.66389	0.0176221	0.178179

## Sheet: family
family	ra	group	LDA	p	FDR
k__Bacteria_p__Fusobacteria_c__Fusobacteriia_o__Fusobacteriales_f__Fusobacteriaceae	3.07414	PACS, Baseline at admission	2.70774	4.35692e-06	0.000476112
k__Bacteria_p__Bacteroidetes_c__Bacteroidia_o__Bacteroidales_f__Tannerellaceae	3.79948	PACS, Baseline at admission	3.41942	9.90788e-06	0.00093184
k__Bacteria_p__Bacteroidetes_c__Bacteroidia_o__Bacteroidales_f__Bacteroidaceae	4.51886	PACS, Baseline at admission	4.01	9.94598e-05	0.00407595
k__Bacteria_p__Firmicutes_c__Clostridia_o__Clostridiales_f__Ruminococcaceae	4.30623	Non-COVID-19 controls	3.6427	0.000100779	0.00407595
k__Bacteria_p__Firmicutes_c__Bacilli_o__Bacillales_f__Staphylococcaceae	2.45577	PACS, Baseline at admission	2.21212	0.000834838	0.0198183
k__Bacteria_p__Firmicutes_c__Firmicutes_unclassified_o__Firmicutes_unclassified_f__Firmicutes_unclassified	3.06396	Non-COVID-19 controls	2.45606	0.00128847	0.0260558
k__Bacteria_p__Actinobacteria_c__Coriobacteriia_o__Coriobacteriales_f__Coriobacteriaceae	4.04187	Non-COVID-19 controls	3.48455	0.00492469	0.0726724
k__Bacteria_p__Actinobacteria_c__Actinobacteria_o__Actinomycetales_f__Actinomycetaceae	3.17816	PACS, Baseline at admission	2.79848	0.0111664	0.12972
k__Bacteria_p__Firmicutes_c__Clostridia_o__Clostridiales_f__Eubacteriaceae	3.66005	Non-COVID-19 controls	2.64947	0.0170861	0.177696
k__Bacteria_p__Firmicutes_c__Erysipelotrichia_o__Erysipelotrichales_f__Erysipelotrichaceae	3.15886	PACS, Baseline at admission	2.66389	0.0176221	0.178179

## Sheet: genus
genus	ra	group	LDA	p	FDR
k__Bacteria_p__Actinobacteria_c__Coriobacteriia_o__Eggerthellales_f__Eggerthellaceae_g__Adlercreutzia	3.02723	Non-COVID-19 controls	2.67389	6.70679e-08	3.66366e-05
k__Bacteria_p__Actinobacteria_c__Coriobacteriia_o__Eggerthellales_f__Eggerthellaceae_g__Asaccharobacter	2.51132	Non-COVID-19 controls	2.15325	5.85025e-07	0.000141742
k__Bacteria_p__Fusobacteria_c__Fusobacteriia_o__Fusobacteriales_f__Fusobacteriaceae_g__Fusobacterium	3.07414	PACS, Baseline at admission	2.71581	4.35692e-06	0.000476112
k__Bacteria_p__Bacteroidetes_c__Bacteroidia_o__Bacteroidales_f__Tannerellaceae_g__Parabacteroides	3.79947	PACS, Baseline at admission	3.41941	1.08384e-05	0.00093184
k__Bacteria_p__Firmicutes_c__Clostridia_o__Clostridiales_f__Lachnospiraceae_g__Fusicatenibacter	3.61442	Non-COVID-19 controls	3.06289	1.28076e-05	0.00093184
k__Bacteria_p__Firmicutes_c__Clostridia_o__Clostridiales_f__Ruminococcaceae_g__Agathobaculum	3.19082	Non-COVID-19 controls	2.66275	1.65858e-05	0.00106631
k__Bacteria_p__Actinobacteria_c__Coriobacteriia_o__Eggerthellales_f__Eggerthellaceae_g__Enterorhabdus	0.813749	Non-COVID-19 controls	2.12528	1.98274e-05	0.00108704
k__Bacteria_p__Firmicutes_c__Clostridia_o__Clostridiales_f__Ruminococcaceae_g__Faecalibacterium	3.79958	Non-COVID-19 controls	3.22697	2.18745e-05	0.00108704
k__Bacteria_p__Bacteroidetes_c__Bacteroidia_o__Bacteroidales_f__Bacteroidaceae_g__Bacteroides	4.51886	PACS, Baseline at admission	4.01009	9.71524e-05	0.00407595
k__Bacteria_p__Firmicutes_c__Erysipelotrichia_o__Erysipelotrichales_f__Erysipelotrichaceae_g__Erysipelatoclostridium	2.93389	PACS, Baseline at admission	2.52185	0.000199863	0.00689745
k__Bacteria_p__Firmicutes_c__Clostridia_o__Clostridiales_f__Ruminococcaceae_g__Ruminococcaceae_unclassified	2.80338	Non-COVID-19 controls	2.44643	0.000221255	0.00732153
k__Bacteria_p__Firmicutes_c__Clostridia_o__Clostridiales_f__Lachnospiraceae_g__Lachnoclostridium	3.23275	PACS, Baseline at admission	2.93308	0.000258732	0.00807244
k__Bacteria_p__Firmicutes_c__Clostridia_o__Clostridiales_f__Lachnospiraceae_g__Roseburia	3.66198	Non-COVID-19 controls	3.04363	0.000303478	0.0092055
k__Bacteria_p__Firmicutes_c__Clostridia_o__Clostridiales_f__Ruminococcaceae_g__Ruminococcus	3.98458	Non-COVID-19 controls	3.3533	0.000626089	0.0162783
k__Bacteria_p__Firmicutes_c__Clostridia_o__Clostridiales_f__Lachnospiraceae_g__Dorea	3.66913	Non-COVID-19 controls	2.95652	0.000757713	0.0192424
k__Bacteria_p__Firmicutes_c__Bacilli_o__Bacillales_f__Staphylococcaceae_g__Staphylococcus	2.45577	PACS, Baseline at admission	2.21446	0.000834838	0.0198183
k__Bacteria_p__Firmicutes_c__Clostridia_o__Clostridiales_f__Ruminococcaceae_g__Gemmiger	2.76341	Non-COVID-19 controls	2.29879	0.000872604	0.0198517
k__Bacteria_p__Firmicutes_c__Firmicutes_unclassified_o__Firmicutes_unclassified_f__Firmicutes_unclassified_g__Firmicutes_unclassified	3.06396	Non-COVID-19 controls	2.45606	0.00128847	0.0260558
k__Bacteria_p__Firmicutes_c__Clostridia_o__Clostridiales_f__Lachnospiraceae_g__Coprococcus	3.45822	Non-COVID-19 controls	2.90546	0.00170528	0.0315622
k__Bacteria_p__Firmicutes_c__Negativicutes_o__Veillonellales_f__Veillonellaceae_g__Dialister	3.43389	Non-COVID-19 controls	3.10634	0.00188399	0.0342887
k__Bacteria_p__Firmicutes_c__Clostridia_o__Clostridiales_f__Lachnospiraceae_g__Lachnospiraceae_unclassified	3.7758	Non-COVID-19 controls	3.196	0.002018	0.0361255
k__Bacteria_p__Actinobacteria_c__Actinobacteria_o__Bifidobacteriales_f__Bifidobacteriaceae_g__Parascardovia	1.30104	PACS, Baseline at admission	2.30445	0.00619613	0.0856478
k__Bacteria_p__Firmicutes_c__Clostridia_o__Clostridiales_f__Lachnospiraceae_g__Stomatobaculum	2.01604	PACS, Baseline at admission	2.21312	0.00619613	0.0856478
k__Bacteria_p__Actinobacteria_c__Coriobacteriia_o__Coriobacteriales_f__Coriobacteriaceae_g__Collinsella	4.03499	Non-COVID-19 controls	3.47803	0.00882001	0.111994
k__Bacteria_p__Actinobacteria_c__Actinobacteria_o__Actinomycetales_f__Actinomycetaceae_g__Actinomyces	3.16474	PACS, Baseline at admission	2.78553	0.0121095	0.137746
k__Bacteria_p__Firmicutes_c__Clostridia_o__Clostridiales_f__Eubacteriaceae_g__Eubacterium	3.6598	Non-COVID-19 controls	2.65023	0.0160571	0.170236
k__Bacteria_p__Actinobacteria_c__Actinobacteria_o__Bifidobacteriales_f__Bifidobacteriaceae_g__Scardovia	2.36859	PACS, Baseline at admission	2.06717	0.0236263	0.230356
k__Bacteria_p__Firmicutes_c__Clostridia_o__Clostridiales_f__Lachnospiraceae_g__Lachnospira	2.66207	PACS, Baseline at admission	2.04086	0.0291705	0.269951
k__Bacteria_p__Firmicutes_c__Clostridia_o__Clostridiales_f__Ruminococcaceae_g__Ruthenibacterium	3.11854	PACS, Baseline at admission	2.51215	0.0296861	0.270144
k__Bacteria_p__Firmicutes_c__Clostridia_o__Clostridiales_f__Eubacteriaceae_g__Eubacteriaceae_unclassified	0.126146	Non-COVID-19 controls	2.20356	0.0373746	0.31155
k__Bacteria_p__Actinobacteria_c__Actinobacteria_o__Bifidobacteriales_f__Bifidobacteriaceae_g__Bifidobacterium	4.44057	Non-COVID-19 controls	3.69302	0.0410924	0.334872

## Sheet: species
Species	ra	group	LDA	p	FDR
k__Bacteria_p__Actinobacteria_c__Coriobacteriia_o__Eggerthellales_f__Eggerthellaceae_g__Adlercreutzia_s__Adlercreutzia_equolifaciens	3.02723	Non-COVID-19 controls	-2.67334	6.70679e-08	3.66366e-05
k__Bacteria_p__Actinobacteria_c__Coriobacteriia_o__Eggerthellales_f__Eggerthellaceae_g__Asaccharobacter_s__Asaccharobacter_celatus	2.51132	Non-COVID-19 controls	-2.15192	5.85025e-07	0.000141742
k__Bacteria_p__Bacteroidetes_c__Bacteroidia_o__Bacteroidales_f__Tannerellaceae_g__Parabacteroides_s__Parabacteroides_distasonis	3.69375	PACS, Baseline at admission	3.32877	6.49064e-07	0.000141742
k__Bacteria_p__Firmicutes_c__Clostridia_o__Clostridiales_f__Ruminococcaceae_g__Ruminococcaceae_unclassified_s__Clostridium_leptum	2.5695	Non-COVID-19 controls	-2.23689	1.16831e-05	0.00093184
k__Bacteria_p__Firmicutes_c__Clostridia_o__Clostridiales_f__Lachnospiraceae_g__Fusicatenibacter_s__Fusicatenibacter_saccharivorans	3.61442	Non-COVID-19 controls	-3.06289	1.28076e-05	0.00093184
k__Bacteria_p__Firmicutes_c__Clostridia_o__Clostridiales_f__Ruminococcaceae_g__Agathobaculum_s__Agathobaculum_butyriciproducens	3.19082	Non-COVID-19 controls	-2.66275	1.65858e-05	0.00106631
k__Bacteria_p__Actinobacteria_c__Coriobacteriia_o__Eggerthellales_f__Eggerthellaceae_g__Enterorhabdus_s__Enterorhabdus_caecimuris	0.813749	Non-COVID-19 controls	-2.09028	1.98274e-05	0.00108704
k__Bacteria_p__Bacteroidetes_c__Bacteroidia_o__Bacteroidales_f__Bacteroidaceae_g__Bacteroides_s__Bacteroides_vulgatus	4.07972	PACS, Baseline at admission	3.59527	2.15977e-05	0.00108704
k__Bacteria_p__Firmicutes_c__Clostridia_o__Clostridiales_f__Ruminococcaceae_g__Faecalibacterium_s__Faecalibacterium_prausnitzii	3.79958	Non-COVID-19 controls	-3.22697	2.18745e-05	0.00108704
k__Bacteria_p__Firmicutes_c__Clostridia_o__Clostridiales_f__Lachnospiraceae_g__Roseburia_s__Roseburia_faecis	3.37228	Non-COVID-19 controls	-2.88697	4.3664e-05	0.0020748
k__Bacteria_p__Firmicutes_c__Clostridia_o__Clostridiales_f__Lachnospiraceae_g__Lachnospiraceae_unclassified_s__Eubacterium_rectale	3.7758	Non-COVID-19 controls	-3.26529	5.9757e-05	0.0027209
k__Bacteria_p__Firmicutes_c__Clostridia_o__Clostridiales_f__Lachnospiraceae_g__Coprococcus_s__Coprococcus_comes	3.2939	Non-COVID-19 controls	-2.78332	0.000109742	0.00427994
k__Bacteria_p__Firmicutes_c__Clostridia_o__Clostridiales_f__Eubacteriaceae_g__Eubacterium_s__Eubacterium_ventriosum	2.30097	Non-COVID-19 controls	-2.18057	0.00013098	0.00482988
k__Bacteria_p__Firmicutes_c__Clostridia_o__Clostridiales_f__Lachnospiraceae_g__Lachnoclostridium_s__Clostridium_bolteae	2.9071	PACS, Baseline at admission	2.64592	0.000132689	0.00482988
k__Bacteria_p__Fusobacteria_c__Fusobacteriia_o__Fusobacteriales_f__Fusobacteriaceae_g__Fusobacterium_s__Fusobacterium_varium	2.93317	PACS, Baseline at admission	2.56629	0.000202123	0.00689745
k__Bacteria_p__Firmicutes_c__Clostridia_o__Clostridiales_f__Ruminococcaceae_g__Ruminococcus_s__Ruminococcus_lactaris	2.9494	Non-COVID-19 controls	-2.40823	0.000231703	0.00744176
k__Bacteria_p__Firmicutes_c__Clostridia_o__Clostridiales_f__Lachnospiraceae_g__Roseburia_s__Roseburia_hominis	2.57306	Non-COVID-19 controls	-2.14533	0.000324242	0.00956952
k__Bacteria_p__Firmicutes_c__Clostridia_o__Clostridiales_f__Lachnospiraceae_g__Blautia_s__Blautia_obeum	3.44646	Non-COVID-19 controls	-2.92977	0.000420753	0.0120911
k__Bacteria_p__Firmicutes_c__Bacilli_o__Lactobacillales_f__Lactobacillaceae_g__Lactobacillus_s__Lactobacillus_fermentum	1.54104	Non-COVID-19 controls	-2.76014	0.000822593	0.0198183
k__Bacteria_p__Firmicutes_c__Clostridia_o__Clostridiales_f__Ruminococcaceae_g__Gemmiger_s__Gemmiger_formicilis	2.76341	Non-COVID-19 controls	-2.306	0.000872604	0.0198517
k__Bacteria_p__Firmicutes_c__Clostridia_o__Clostridiales_f__Lachnospiraceae_g__Lachnospiraceae_unclassified_s__Lachnospiraceae_bacterium_2_1_46FAA	2.45755	PACS, Baseline at admission	2.24361	0.00108502	0.0241804
k__Bacteria_p__Firmicutes_c__Negativicutes_o__Veillonellales_f__Veillonellaceae_g__Allisonella_s__Allisonella_histaminiformans	0.777189	PACS, Baseline at admission	2.61568	0.00125849	0.0260558
k__Bacteria_p__Firmicutes_c__Negativicutes_o__Veillonellales_f__Veillonellaceae_g__Megasphaera_s__Megasphaera_elsdenii	2.29449	Non-COVID-19 controls	-2.58938	0.00141725	0.0281389
k__Bacteria_p__Firmicutes_c__Clostridia_o__Clostridiales_f__Lachnospiraceae_g__Dorea_s__Dorea_longicatena	3.46525	Non-COVID-19 controls	-2.77819	0.0014531	0.0283355
k__Bacteria_p__Firmicutes_c__Erysipelotrichia_o__Erysipelotrichales_f__Erysipelotrichaceae_g__Erysipelatoclostridium_s__Erysipelatoclostridium_ramosum	2.54056	PACS, Baseline at admission	2.14901	0.00167851	0.0315622
k__Bacteria_p__Firmicutes_c__Bacilli_o__Lactobacillales_f__Streptococcaceae_g__Streptococcus_s__Streptococcus_vestibularis	2.38823	PACS, Baseline at admission	2.11949	0.00169755	0.0315622
k__Bacteria_p__Firmicutes_c__Clostridia_o__Clostridiales_f__Lachnospiraceae_g__Lachnoclostridium_s__Clostridium_lavalense	1.09474	Non-COVID-19 controls	-2.35217	0.00205266	0.0361533
k__Bacteria_p__Firmicutes_c__Clostridia_o__Clostridiales_f__Eubacteriaceae_g__Eubacterium_s__Eubacterium_sp_CAG_38	2.27102	Non-COVID-19 controls	-2.37595	0.00210569	0.0364987
k__Bacteria_p__Firmicutes_c__Bacilli_o__Lactobacillales_f__Streptococcaceae_g__Lactococcus_s__Lactococcus_petauri	1.50214	Non-COVID-19 controls	-3.01067	0.00249657	0.0419913
k__Bacteria_p__Firmicutes_c__Firmicutes_unclassified_o__Firmicutes_unclassified_f__Firmicutes_unclassified_g__Firmicutes_unclassified_s__Firmicutes_bacterium_CAG_83	3.0111	Non-COVID-19 controls	-2.41462	0.00252965	0.0419913
k__Bacteria_p__Firmicutes_c__Clostridia_o__Clostridiales_f__Lachnospiraceae_g__Roseburia_s__Roseburia_intestinalis	2.62709	Non-COVID-19 controls	-2.20585	0.00253794	0.0419913
k__Bacteria_p__Firmicutes_c__Bacilli_o__Bacillales_f__Staphylococcaceae_g__Staphylococcus_s__Staphylococcus_epidermidis	2.36807	PACS, Baseline at admission	2.17559	0.0025975	0.0423354
k__Bacteria_p__Actinobacteria_c__Actinobacteria_o__Bifidobacteriales_f__Bifidobacteriaceae_g__Bifidobacterium_s__Bifidobacterium_pseudocatenulatum	4.01866	Non-COVID-19 controls	-3.39601	0.00294841	0.0473479
k__Bacteria_p__Firmicutes_c__Clostridia_o__Clostridiales_f__Eubacteriaceae_g__Eubacterium_s__Eubacterium_ramulus	2.5674	Non-COVID-19 controls	-3.67379	0.00320213	0.0506771
k__Bacteria_p__Firmicutes_c__Clostridia_o__Clostridiales_f__Clostridiaceae_g__Hungatella_s__Hungatella_hathewayi	2.28689	Non-COVID-19 controls	-3.65849	0.00340949	0.0531881
k__Bacteria_p__Firmicutes_c__Clostridia_o__Clostridiales_f__Lachnospiraceae_g__Blautia_s__Ruminococcus_torques	3.53072	Non-COVID-19 controls	-2.79736	0.00432271	0.0655611
k__Bacteria_p__Firmicutes_c__Clostridia_o__Clostridiales_f__Clostridiales_unclassified_g__Lawsonibacter_s__Lawsonibacter_asaccharolyticus	1.33905	Non-COVID-19 controls	-2.82111	0.0046642	0.0697714
k__Bacteria_p__Firmicutes_c__Clostridia_o__Clostridiales_f__Lachnospiraceae_g__Dorea_s__Dorea_formicigenerans	3.2262	Non-COVID-19 controls	-2.4677	0.00599792	0.0856478
k__Bacteria_p__Firmicutes_c__Clostridia_o__Clostridiales_f__Lachnospiraceae_g__Stomatobaculum_s__Stomatobaculum_longum	2.01604	PACS, Baseline at admission	2.17103	0.00619613	0.0856478
k__Bacteria_p__Actinobacteria_c__Actinobacteria_o__Bifidobacteriales_f__Bifidobacteriaceae_g__Parascardovia_s__Parascardovia_denticolens	1.30104	PACS, Baseline at admission	2.263	0.00619613	0.0856478
k__Bacteria_p__Firmicutes_c__Negativicutes_o__Veillonellales_f__Veillonellaceae_g__Dialister_s__Dialister_sp_CAG_357	3.42429	Non-COVID-19 controls	-3.08881	0.00648311	0.0884945
k__Bacteria_p__Firmicutes_c__Clostridia_o__Clostridiales_f__Lachnospiraceae_g__Lachnoclostridium_s__Clostridium_aldenense	1.3072	Non-COVID-19 controls	-2.49401	0.00678432	0.0914626
k__Bacteria_p__Firmicutes_c__Clostridia_o__Clostridiales_f__Ruminococcaceae_g__Ruminococcus_s__Ruminococcus_bicirculans	3.1146	Non-COVID-19 controls	-2.62201	0.00737669	0.0973481
k__Bacteria_p__Actinobacteria_c__Coriobacteriia_o__Coriobacteriales_f__Coriobacteriaceae_g__Collinsella_s__Collinsella_aerofaciens	4.01151	Non-COVID-19 controls	-3.44447	0.00753633	0.0979723
k__Bacteria_p__Firmicutes_c__Clostridia_o__Clostridiales_f__Lachnospiraceae_g__Lachnoclostridium_s__Clostridium_symbiosum	2.25302	Non-COVID-19 controls	-2.21048	0.0082556	0.10606
k__Bacteria_p__Firmicutes_c__Clostridia_o__Clostridiales_f__Lachnospiraceae_g__Lachnoclostridium_s__Clostridium_citroniae	2.00899	Non-COVID-19 controls	-2.46299	0.00910164	0.113824
k__Bacteria_p__Actinobacteria_c__Actinobacteria_o__Actinomycetales_f__Actinomycetaceae_g__Actinomyces_s__Actinomyces_sp_oral_taxon_180	1.03018	Non-COVID-19 controls	-2.20159	0.00946309	0.113824
k__Bacteria_p__Firmicutes_c__Clostridia_o__Clostridiales_f__Eubacteriaceae_g__Eubacterium_s__Eubacterium_sp_CAG_251	2.76095	Non-COVID-19 controls	-2.30195	0.00948531	0.113824
k__Bacteria_p__Firmicutes_c__Clostridia_o__Clostridiales_f__Christensenellaceae_g__Christensenella_s__Christensenella_minuta	1.22775	Non-COVID-19 controls	-4.31155	0.00970839	0.115234
k__Bacteria_p__Firmicutes_c__Clostridia_o__Clostridiales_f__Ruminococcaceae_g__Anaeromassilibacillus_s__Anaeromassilibacillus_sp_An250	1.10762	PACS, Baseline at admission	4.31155	0.0125969	0.141813
k__Bacteria_p__Actinobacteria_c__Actinobacteria_o__Actinomycetales_f__Actinomycetaceae_g__Actinomyces_s__Actinomyces_graevenitzii	1.73682	PACS, Baseline at admission	3.18709	0.0132416	0.146452
k__Bacteria_p__Firmicutes_c__Clostridia_o__Clostridiales_f__Oscillospiraceae_g__Oscillibacter_s__Oscillibacter_sp_CAG_241	2.06058	PACS, Baseline at admission	2.10483	0.0132772	0.146452
k__Bacteria_p__Firmicutes_c__Erysipelotrichia_o__Erysipelotrichales_f__Erysipelotrichaceae_g__Holdemania_s__Holdemania_filiformis	1.33764	PACS, Baseline at admission	2.2022	0.0143745	0.15697
k__Bacteria_p__Actinobacteria_c__Actinobacteria_o__Bifidobacteriales_f__Bifidobacteriaceae_g__Scardovia_s__Scardovia_inopinata	0.0315576	PACS, Baseline at admission	2.66795	0.0147899	0.159907
k__Bacteria_p__Firmicutes_c__Clostridia_o__Clostridiales_f__Lachnospiraceae_g__Blautia_s__Ruminococcus_gnavus	3.70789	PACS, Baseline at admission	3.16571	0.016031	0.170236
k__Bacteria_p__Actinobacteria_c__Actinobacteria_o__Bifidobacteriales_f__Bifidobacteriaceae_g__Bifidobacterium_s__Bifidobacterium_adolescentis	3.93829	Non-COVID-19 controls	-3.45699	0.0169843	0.177696
k__Bacteria_p__Fusobacteria_c__Fusobacteriia_o__Fusobacteriales_f__Fusobacteriaceae_g__Fusobacterium_s__Fusobacterium_ulcerans	1.64475	Non-COVID-19 controls	-3.09619	0.0196343	0.194915
k__Bacteria_p__Bacteroidetes_c__Bacteroidia_o__Bacteroidales_f__Barnesiellaceae_g__Barnesiella_s__Barnesiella_intestinihominis	2.40028	Non-COVID-19 controls	-2.17332	0.0224316	0.220678
k__Bacteria_p__Firmicutes_c__Bacilli_o__Lactobacillales_f__Streptococcaceae_g__Lactococcus_s__Lactococcus_garvieae	1.22259	PACS, Baseline at admission	2.14459	0.0239196	0.231152
k__Bacteria_p__Firmicutes_c__Firmicutes_unclassified_o__Firmicutes_unclassified_f__Firmicutes_unclassified_g__Firmicutes_unclassified_s__Firmicutes_bacterium_CAG_110	1.76127	PACS, Baseline at admission	2.99454	0.0252857	0.242093
k__Bacteria_p__Proteobacteria_c__Betaproteobacteria_o__Burkholderiales_f__Oxalobacteraceae_g__Oxalobacter_s__Oxalobacter_formigenes	1.6583	PACS, Baseline at admission	2.74345	0.0254952	0.242093
k__Bacteria_p__Actinobacteria_c__Actinobacteria_o__Micrococcales_f__Micrococcaceae_g__Rothia_s__Rothia_mucilaginosa	1.76702	PACS, Baseline at admission	2.81637	0.0279129	0.262766
k__Bacteria_p__Firmicutes_c__Clostridia_o__Clostridiales_f__Lachnospiraceae_g__Lachnospira_s__Lachnospira_pectinoschiza	2.66207	PACS, Baseline at admission	2.0411	0.0291705	0.269951
k__Bacteria_p__Firmicutes_c__Clostridia_o__Clostridiales_f__Ruminococcaceae_g__Ruthenibacterium_s__Ruthenibacterium_lactatiformans	3.11854	PACS, Baseline at admission	2.51215	0.0296861	0.270144
k__Bacteria_p__Firmicutes_c__Negativicutes_o__Acidaminococcales_f__Acidaminococcaceae_g__Phascolarctobacterium_s__Phascolarctobacterium_succinatutens	2.54085	Non-COVID-19 controls	-2.20014	0.0304877	0.273804
k__Bacteria_p__Firmicutes_c__Bacilli_o__Lactobacillales_f__Streptococcaceae_g__Streptococcus_s__Streptococcus_anginosus_group	1.50814	Non-COVID-19 controls	-3.03595	0.0306181	0.273804
k__Bacteria_p__Actinobacteria_c__Actinobacteria_o__Actinomycetales_f__Actinomycetaceae_g__Actinomyces_s__Actinomyces_odontolyticus	2.12128	Non-COVID-19 controls	-2.68134	0.0308405	0.273804
k__Bacteria_p__Actinobacteria_c__Coriobacteriia_o__Coriobacteriales_f__Coriobacteriaceae_g__Collinsella_s__Collinsella_stercoris	2.0505	Non-COVID-19 controls	-2.99846	0.033138	0.291828
k__Bacteria_p__Firmicutes_c__Clostridia_o__Clostridiales_f__Peptostreptococcaceae_g__Romboutsia_s__Romboutsia_ilealis	0.888059	Non-COVID-19 controls	-2.5261	0.0345509	0.299441
k__Bacteria_p__Firmicutes_c__Bacilli_o__Bacillales_f__Staphylococcaceae_g__Staphylococcus_s__Staphylococcus_aureus	1.57522	Non-COVID-19 controls	-3.00731	0.0355822	0.30356
k__Bacteria_p__Firmicutes_c__Bacilli_o__Lactobacillales_f__Lactobacillaceae_g__Lactobacillus_s__Lactobacillus_mucosae	0.514818	Non-COVID-19 controls	-3.00731	0.0355822	0.30356
k__Bacteria_p__Firmicutes_c__Clostridia_o__Clostridiales_f__Clostridiaceae_g__Clostridium_s__Clostridium_bolteae_CAG_59	2.62001	PACS, Baseline at admission	2.36459	0.0367321	0.310941
k__Bacteria_p__Firmicutes_c__Clostridia_o__Clostridiales_f__Eubacteriaceae_g__Eubacteriaceae_unclassified_s__Eubacteriaceae_bacterium_CHKCI005	0.126146	Non-COVID-19 controls	-2.16971	0.0373746	0.31155
k__Bacteria_p__Actinobacteria_c__Actinobacteria_o__Micrococcales_f__Micrococcaceae_g__Rothia_s__Rothia_aeria	1.81268	Non-COVID-19 controls	-3.00731	0.0378187	0.312863
k__Bacteria_p__Firmicutes_c__Bacilli_o__Lactobacillales_f__Aerococcaceae_g__Abiotrophia_s__Abiotrophia_sp_HMSC24B09	1.75469	Non-COVID-19 controls	-2.33505	0.0404794	0.332357
k__Bacteria_p__Firmicutes_c__Bacilli_o__Lactobacillales_f__Aerococcaceae_g__Abiotrophia_s__Abiotrophia_defectiva	0.976659	Non-COVID-19 controls	-2.496	0.0416318	0.336755
k__Bacteria_p__Actinobacteria_c__Actinobacteria_o__Bifidobacteriales_f__Bifidobacteriaceae_g__Scardovia_s__Scardovia_wiggsiae	2.36658	PACS, Baseline at admission	2.0615	0.0420765	0.33785
k__Bacteria_p__Firmicutes_c__Erysipelotrichia_o__Erysipelotrichales_f__Erysipelotrichaceae_g__Erysipelatoclostridium_s__Clostridium_innocuum	2.67421	PACS, Baseline at admission	2.24874	0.0424997	0.338757
k__Bacteria_p__Firmicutes_c__Bacilli_o__Lactobacillales_f__Streptococcaceae_g__Streptococcus_s__Streptococcus_mutans	1.00789	PACS, Baseline at admission	3.08946	0.0470708	0.370831
k__Bacteria_p__Firmicutes_c__Clostridia_o__Clostridiales_f__Eubacteriaceae_g__Eubacterium_s__Eubacterium_sp_CAG_274	2.37028	PACS, Baseline at admission	2.63404	0.0472029	0.370831
k__Bacteria_p__Bacteroidetes_c__Bacteroidia_o__Bacteroidales_f__Bacteroidaceae_g__Bacteroides_s__Bacteroides_caccae	3.23481	PACS, Baseline at admission	2.81153	0.0479835	0.373973
