# Supplementary material for: Gut microbiota dynamics in a prospective cohort of patients with post-acute COVID-19 syndrome
Source: HighWire-hosted journal article supplement (doi:10.1136/gutjnl-2021-325989), 2022-01-26
Supplement: gutjnl-2021-325989supp015_data_supplement.xlsx [file gutjnl-2021-325989supp015_data_supplement.xlsx]

## Sheet: Fatigue
feature	metadata	value	coef	stderr	pval	name	qval
s__Agathobaculum_butyriciproducens	Group	Fatigue	-1.311	0.294457	6.39978e-05	GroupFatigue	0.00471158
s__Actinomyces_odontolyticus	Group	Fatigue	0.740745	0.166752	6.60501e-05	GroupFatigue	0.00471158
s__Actinomyces_oris	Group	Fatigue	0.900685	0.19457	3.666e-05	GroupFatigue	0.00471158
s__Actinomyces_naeslundii	Group	Fatigue	1.08952	0.257367	0.00012652	GroupFatigue	0.00676881
s__Roseburia_hominis	Group	Fatigue	-1.13849	0.334484	0.00149696	GroupFatigue	0.0399325
s__Eubacterium_rectale	Group	Fatigue	-0.941748	0.27437	0.00137935	GroupFatigue	0.0399325
s__Faecalibacterium_prausnitzii	Group	Fatigue	-0.787421	0.238361	0.00198766	GroupFatigue	0.0399325
s__Ruthenibacterium_lactatiformans	Group	Fatigue	-0.758547	0.221765	0.00142708	GroupFatigue	0.0399325
s__Olsenella_uli	Group	Fatigue	0.441917	0.134239	0.00205261	GroupFatigue	0.0399325
s__Actinomyces_sp_oral_taxon_448	Group	Fatigue	0.442353	0.132525	0.00180406	GroupFatigue	0.0399325
s__Rothia_mucilaginosa	Group	Fatigue	0.647685	0.190896	0.00154391	GroupFatigue	0.0399325
s__Gemmiger_formicilis	Group	Fatigue	-0.899479	0.286039	0.00309046	GroupFatigue	0.0551132
s__Anaerostipes_hadrus	Group	Fatigue	-1.06492	0.34811	0.00390186	GroupFatigue	0.0596427
s__Corynebacterium_durum	Group	Fatigue	0.175314	0.0571335	0.00380412	GroupFatigue	0.0596427
s__Clostridium_innocuum	Group	Fatigue	1.04666	0.347748	0.00445743	GroupFatigue	0.0635927
s__Actinomyces_massiliensis	Group	Fatigue	0.224745	0.0762252	0.00525309	GroupFatigue	0.07026
s__Actinomyces_sp_oral_taxon_414	Group	Fatigue	0.377035	0.131821	0.00663162	GroupFatigue	0.0788426
s__Bifidobacterium_dentium	Group	Fatigue	0.711288	0.247904	0.00647682	GroupFatigue	0.0788426
s__Clostridium_leptum	Group	Fatigue	-0.744872	0.265425	0.00763194	GroupFatigue	0.0859597
s__Propionibacterium_acidifaciens	Group	Fatigue	0.444076	0.161631	0.0088846	GroupFatigue	0.0950652
s__Actinobaculum_sp_oral_taxon_183	Group	Fatigue	0.462246	0.171312	0.0100744	GroupFatigue	0.102663
s__Eubacterium_sp_CAG_274	Group	Fatigue	-0.770268	0.287492	0.0105721	GroupFatigue	0.102838
s__Collinsella_aerofaciens	Group	Fatigue	-0.937498	0.353317	0.0112856	GroupFatigue	0.105005
s__Bifidobacterium_pseudocatenulatum	Group	Fatigue	-1.23171	0.473078	0.012787	GroupFatigue	0.105247
s__Lactobacillus_mucosae	Group	Fatigue	0.460332	0.175849	0.0123424	GroupFatigue	0.105247
s__Streptococcus_anginosus_group	Group	Fatigue	0.684848	0.260404	0.0119719	GroupFatigue	0.105247
s__Eubacterium_ventriosum	Group	Fatigue	-0.693974	0.272708	0.0147963	GroupFatigue	0.117275
s__Eubacterium_hallii	Group	Fatigue	-0.543867	0.220936	0.0181259	GroupFatigue	0.129839
s__Actinomyces_sp_oral_taxon_897	Group	Fatigue	0.25994	0.10567	0.0182017	GroupFatigue	0.129839
s__Erysipelatoclostridium_ramosum	Group	Fatigue	0.695952	0.280577	0.0173186	GroupFatigue	0.129839
s__Fusicatenibacter_saccharivorans	Group	Fatigue	-0.626748	0.261155	0.0210251	GroupFatigue	0.140605
s__Streptococcus_gordonii	Group	Fatigue	0.467689	0.194034	0.0205071	GroupFatigue	0.140605
s__Streptococcus_vestibularis	Group	Fatigue	0.502157	0.211523	0.0223616	GroupFatigue	0.145011
s__Coprococcus_comes	Group	Fatigue	-0.787613	0.341337	0.0261543	GroupFatigue	0.164619
s__Lactobacillus_salivarius	Group	Fatigue	0.235986	0.104213	0.0288992	GroupFatigue	0.176357
s__Megasphaera_micronuciformis	Group	Fatigue	0.655805	0.291069	0.0296675	GroupFatigue	0.176357
s__Streptococcus_parasanguinis	Group	Fatigue	0.718733	0.321923	0.0310958	GroupFatigue	0.179852
s__Oscillibacter_sp_57_20	Group	Fatigue	-0.679971	0.306712	0.0322297	GroupFatigue	0.180357
s__Intestinibacter_bartlettii	Group	Fatigue	0.818507	0.37064	0.0328687	GroupFatigue	0.180357
s__Firmicutes_bacterium_CAG_83	Group	Fatigue	-0.833287	0.381816	0.0348616	GroupFatigue	0.18651
s__Dialister_sp_CAG_357	Group	Fatigue	-0.990743	0.460441	0.037359	GroupFatigue	0.190882
s__Streptococcus_infantis	Group	Fatigue	0.435186	0.202366	0.0374628	GroupFatigue	0.190882
s__Faecalicoccus_pleomorphus	Group	Fatigue	0.341029	0.160006	0.0391026	GroupFatigue	0.194604
s__Anaerostipes_caccae	Group	Fatigue	0.495755	0.235812	0.0417091	GroupFatigue	0.202858
s__Alistipes_putredinis	Group	Fatigue	-0.714868	0.343522	0.0437213	GroupFatigue	0.207919
s__Dorea_formicigenerans	Group	Fatigue	-0.495392	0.242472	0.0475072	GroupFatigue	0.221012

## Sheet: Gastrointestinal
feature	metadata	value	coef	stderr	pval	name	qval
s__Actinomyces_naeslundii	Group	gastrointestinal	1.2391	0.280606	0.000120488	Groupgastrointestinal	0.0221698
s__Agathobaculum_butyriciproducens	Group	gastrointestinal	-1.17429	0.311307	0.000711356	Groupgastrointestinal	0.0654448
s__Faecalibacterium_prausnitzii	Group	gastrointestinal	-1.45406	0.418138	0.0015678	Groupgastrointestinal	0.0961584
s__Ruminococcus_gnavus	Group	gastrointestinal	1.43373	0.432315	0.00239464	Groupgastrointestinal	0.110153
s__Lactobacillus_salivarius	Group	gastrointestinal	0.595482	0.194986	0.00470347	Groupgastrointestinal	0.125974
s__Eubacterium_limosum	Group	gastrointestinal	0.816256	0.268493	0.00487101	Groupgastrointestinal	0.125974
s__Erysipelatoclostridium_ramosum	Group	gastrointestinal	0.993037	0.32087	0.00423995	Groupgastrointestinal	0.125974
s__Clostridium_innocuum	Group	gastrointestinal	1.2339	0.412175	0.00547713	Groupgastrointestinal	0.125974
s__Gemmiger_formicilis	Group	gastrointestinal	-0.781943	0.275112	0.00798106	Groupgastrointestinal	0.151084
s__Actinobaculum_sp_oral_taxon_183	Group	gastrointestinal	0.480948	0.1702	0.00831118	Groupgastrointestinal	0.151084
s__Intestinibacter_bartlettii	Group	gastrointestinal	1.11748	0.400271	0.00903218	Groupgastrointestinal	0.151084
s__Bifidobacterium_pseudocatenulatum	Group	gastrointestinal	-1.59445	0.607759	0.0135509	Groupgastrointestinal	0.207781
s__Eisenbergiella_tayi	Group	gastrointestinal	0.525637	0.204619	0.0154202	Groupgastrointestinal	0.218255
s__Oscillibacter_sp_57_20	Group	gastrointestinal	-0.99063	0.39317	0.0173072	Groupgastrointestinal	0.227467
s__Asaccharobacter_celatus	Group	gastrointestinal	-1.13004	0.464721	0.0212132	Groupgastrointestinal	0.260215
s__Adlercreutzia_equolifaciens	Group	gastrointestinal	-1.05444	0.439256	0.0227799	Groupgastrointestinal	0.261969
s__Roseburia_hominis	Group	gastrointestinal	-0.930726	0.415368	0.0326001	Groupgastrointestinal	0.340011
s__Clostridium_leptum	Group	gastrointestinal	-0.845022	0.384763	0.0359444	Groupgastrointestinal	0.340011
s__Collinsella_aerofaciens	Group	gastrointestinal	-0.592702	0.27476	0.0391281	Groupgastrointestinal	0.340011
s__Ruminococcus_torques	Group	gastrointestinal	-0.589219	0.27014	0.0371429	Groupgastrointestinal	0.340011
s__Actinomyces_odontolyticus	Group	gastrointestinal	0.600786	0.269654	0.0335269	Groupgastrointestinal	0.340011
s__Blautia_sp_CAG_257	Group	gastrointestinal	1.2213	0.570848	0.0406535	Groupgastrointestinal	0.340011

## Sheet: Hairloss
feature	metadata	value	coef	stderr	pval	name	qval
s__Dialister_sp_CAG_357	Group	HairLoss	-1.20429	0.548145	0.0349325	GroupHairLoss	0.307024
s__Roseburia_hominis	Group	HairLoss	-1.18336	0.394863	0.00506614	GroupHairLoss	0.13172
s__Agathobaculum_butyriciproducens	Group	HairLoss	-1.03268	0.281822	0.000837692	GroupHairLoss	0.0736917
s__Anaerostipes_hadrus	Group	HairLoss	-0.880322	0.378929	0.0262853	GroupHairLoss	0.303741
s__Faecalibacterium_prausnitzii	Group	HairLoss	-0.858079	0.383092	0.0317458	GroupHairLoss	0.307024
s__Roseburia_inulinivorans	Group	HairLoss	-0.819367	0.350647	0.0254826	GroupHairLoss	0.303741
s__Eubacterium_rectale	Group	HairLoss	-0.767965	0.369755	0.0454315	GroupHairLoss	0.314992
s__Eubacterium_ventriosum	Group	HairLoss	-0.687157	0.301803	0.0292087	GroupHairLoss	0.30377
s__Dorea_formicigenerans	Group	HairLoss	-0.570734	0.268085	0.0405858	GroupHairLoss	0.312661
s__Ruminococcus_lactaris	Group	HairLoss	-0.533409	0.252984	0.0424359	GroupHairLoss	0.314992
s__Gemmiger_formicilis	Group	HairLoss	-0.531887	0.247969	0.0391853	GroupHairLoss	0.312661
s__Actinomyces_sp_oral_taxon_414	Group	HairLoss	0.197087	0.0656423	0.00499375	GroupHairLoss	0.13172
s__Massiliomicrobiota_timonensis	Group	HairLoss	0.273844	0.107749	0.0157671	GroupHairLoss	0.234254
s__Olsenella_uli	Group	HairLoss	0.314737	0.126938	0.0182748	GroupHairLoss	0.25341
s__Firmicutes_bacterium_CAG_94	Group	HairLoss	0.450629	0.203985	0.034005	GroupHairLoss	0.307024
s__Lactonifactor_longoviformis	Group	HairLoss	0.505382	0.214522	0.0243865	GroupHairLoss	0.303741
s__Eisenbergiella_tayi	Group	HairLoss	0.540074	0.184701	0.00610965	GroupHairLoss	0.141201
s__Actinomyces_oris	Group	HairLoss	0.561704	0.175758	0.00300663	GroupHairLoss	0.13172
s__Actinomyces_odontolyticus	Group	HairLoss	0.562589	0.258863	0.0368171	GroupHairLoss	0.307024
s__Faecalicoccus_pleomorphus	Group	HairLoss	0.586197	0.218609	0.0112271	GroupHairLoss	0.201148
s__Pseudoflavonifractor_sp_An184	Group	HairLoss	0.679009	0.266601	0.0155637	GroupHairLoss	0.234254
s__Clostridium_bolteae	Group	HairLoss	0.744261	0.278958	0.0116047	GroupHairLoss	0.201148
s__Bifidobacterium_dentium	Group	HairLoss	0.821544	0.287391	0.00721636	GroupHairLoss	0.1501
s__Eubacterium_limosum	Group	HairLoss	0.831714	0.268289	0.00387214	GroupHairLoss	0.13172
s__Faecalitalea_cylindroides	Group	HairLoss	0.881252	0.405684	0.0369019	GroupHairLoss	0.307024
s__Hungatella_hathewayi	Group	HairLoss	0.98828	0.474299	0.0447785	GroupHairLoss	0.314992
s__Eisenbergiella_massiliensis	Group	HairLoss	1.06379	0.464315	0.0282796	GroupHairLoss	0.30377
s__Streptococcus_anginosus_group	Group	HairLoss	1.0854	0.30329	0.00106286	GroupHairLoss	0.0736917
s__Clostridium_innocuum	Group	HairLoss	1.12142	0.358991	0.0036379	GroupHairLoss	0.13172
s__Intestinibacter_bartlettii	Group	HairLoss	1.38426	0.382995	0.000962959	GroupHairLoss	0.0736917

## Sheet: Musculoskeletal
feature	metadata	value	coef	stderr	pval	name	qval
s__Faecalibacterium_prausnitzii	Group	musculoskeletal	-1.33212	0.385558	0.00139643	Groupmusculoskeletal	0.0512025
s__Agathobaculum_butyriciproducens	Group	musculoskeletal	-1.29163	0.252537	9.89372e-06	Groupmusculoskeletal	0.00198113
s__Anaerostipes_hadrus	Group	musculoskeletal	-1.07481	0.361591	0.00517084	Groupmusculoskeletal	0.0875066
s__Gemmiger_formicilis	Group	musculoskeletal	-1.06738	0.308477	0.00137669	Groupmusculoskeletal	0.0512025
s__Dialister_sp_CAG_357	Group	musculoskeletal	-1.0517	0.502543	0.0432862	Groupmusculoskeletal	0.238074
s__Eubacterium_rectale	Group	musculoskeletal	-0.926326	0.347425	0.011306	Groupmusculoskeletal	0.138185
s__Roseburia_hominis	Group	musculoskeletal	-0.888462	0.394699	0.030415	Groupmusculoskeletal	0.223043
s__Eubacterium_sp_CAG_274	Group	musculoskeletal	-0.865225	0.303838	0.00714804	Groupmusculoskeletal	0.1078
s__Alistipes_putredinis	Group	musculoskeletal	-0.846377	0.401196	0.0417152	Groupmusculoskeletal	0.235317
s__Roseburia_inulinivorans	Group	musculoskeletal	-0.834308	0.330156	0.0159091	Groupmusculoskeletal	0.159091
s__Eubacterium_ventriosum	Group	musculoskeletal	-0.816537	0.266566	0.00406974	Groupmusculoskeletal	0.0875066
s__Asaccharobacter_celatus	Group	musculoskeletal	-0.799906	0.374851	0.0395422	Groupmusculoskeletal	0.235317
s__Adlercreutzia_equolifaciens	Group	musculoskeletal	-0.752182	0.352633	0.0396194	Groupmusculoskeletal	0.235317
s__Oscillibacter_sp_57_20	Group	musculoskeletal	-0.718076	0.327099	0.0344931	Groupmusculoskeletal	0.229954
s__Dorea_formicigenerans	Group	musculoskeletal	-0.627422	0.247361	0.015549	Groupmusculoskeletal	0.159091
s__Ruminococcus_lactaris	Group	musculoskeletal	-0.534013	0.226051	0.0235297	Groupmusculoskeletal	0.191724
s__Actinomyces_sp_oral_taxon_414	Group	musculoskeletal	0.279431	0.0930295	0.00476327	Groupmusculoskeletal	0.0875066
s__Lactobacillus_mucosae	Group	musculoskeletal	0.289353	0.136598	0.0409294	Groupmusculoskeletal	0.235317
s__Faecalicoccus_pleomorphus	Group	musculoskeletal	0.366875	0.173613	0.0413924	Groupmusculoskeletal	0.235317
s__Rothia_mucilaginosa	Group	musculoskeletal	0.385739	0.188837	0.0482545	Groupmusculoskeletal	0.252762
s__Actinomyces_sp_oral_taxon_448	Group	musculoskeletal	0.386768	0.126444	0.00411711	Groupmusculoskeletal	0.0875066
s__Olsenella_uli	Group	musculoskeletal	0.394551	0.130515	0.00452632	Groupmusculoskeletal	0.0875066
s__Blautia_producta	Group	musculoskeletal	0.41414	0.175039	0.0233315	Groupmusculoskeletal	0.191724
s__Actinomyces_naeslundii	Group	musculoskeletal	0.424083	0.156664	0.010214	Groupmusculoskeletal	0.132181
s__Streptococcus_infantis	Group	musculoskeletal	0.452316	0.220099	0.0469848	Groupmusculoskeletal	0.252114
s__Eubacterium_callanderi	Group	musculoskeletal	0.461463	0.183966	0.0166392	Groupmusculoskeletal	0.159158
s__Haemophilus_parainfluenzae	Group	musculoskeletal	0.472343	0.212464	0.0323943	Groupmusculoskeletal	0.229895
s__Eisenbergiella_tayi	Group	musculoskeletal	0.47255	0.181937	0.0134045	Groupmusculoskeletal	0.15521
s__Streptococcus_vestibularis	Group	musculoskeletal	0.516946	0.235121	0.0342348	Groupmusculoskeletal	0.229954
s__Streptococcus_mutans	Group	musculoskeletal	0.549076	0.232259	0.023436	Groupmusculoskeletal	0.191724
s__Actinomyces_odontolyticus	Group	musculoskeletal	0.593297	0.242714	0.0193931	Groupmusculoskeletal	0.17777
s__Bacteroides_thetaiotaomicron	Group	musculoskeletal	0.648947	0.217681	0.00505352	Groupmusculoskeletal	0.0875066
s__Erysipelatoclostridium_ramosum	Group	musculoskeletal	0.716064	0.30749	0.0254432	Groupmusculoskeletal	0.195424
s__Bifidobacterium_dentium	Group	musculoskeletal	0.735712	0.266486	0.00891965	Groupmusculoskeletal	0.122645
s__Clostridium_bolteae	Group	musculoskeletal	0.768216	0.270805	0.00735003	Groupmusculoskeletal	0.1078
s__Ruminococcus_gnavus	Group	musculoskeletal	0.833916	0.392383	0.0403057	Groupmusculoskeletal	0.235317
s__Actinomyces_oris	Group	musculoskeletal	0.855609	0.173874	1.80102e-05	Groupmusculoskeletal	0.00198113
s__Eubacterium_limosum	Group	musculoskeletal	0.933962	0.304738	0.00405201	Groupmusculoskeletal	0.0875066
s__Clostridium_innocuum	Group	musculoskeletal	0.98893	0.425642	0.0257604	Groupmusculoskeletal	0.195424
s__Streptococcus_anginosus_group	Group	musculoskeletal	1.07814	0.263021	0.000217605	Groupmusculoskeletal	0.0159577
s__Hungatella_hathewayi	Group	musculoskeletal	1.09049	0.42501	0.0144792	Groupmusculoskeletal	0.159091
s__Intestinibacter_bartlettii	Group	musculoskeletal	1.30509	0.371858	0.00119816	Groupmusculoskeletal	0.0512025

## Sheet: Neurological
feature	metadata	value	coef	stderr	pval	name	qval
s__Roseburia_hominis	Group	neurological	-1.4813	0.355096	0.000110481	Groupneurological	0.0236429
s__Faecalibacterium_prausnitzii	Group	neurological	-1.08206	0.329523	0.00180126	Groupneurological	0.04283
s__Firmicutes_bacterium_CAG_83	Group	neurological	-0.971539	0.321379	0.00382282	Groupneurological	0.0681736
s__Eubacterium_rectale	Group	neurological	-0.941254	0.275712	0.00122163	Groupneurological	0.04283
s__Anaerostipes_hadrus	Group	neurological	-0.901338	0.311658	0.00550533	Groupneurological	0.0785427
s__Dialister_sp_CAG_357	Group	neurological	-0.868592	0.392213	0.0310287	Groupneurological	0.184448
s__Agathobaculum_butyriciproducens	Group	neurological	-0.867389	0.246363	0.000883003	Groupneurological	0.04283
s__Gemmiger_formicilis	Group	neurological	-0.822942	0.258302	0.00239804	Groupneurological	0.051318
s__Eubacterium_ventriosum	Group	neurological	-0.806686	0.217939	0.000504322	Groupneurological	0.035975
s__Ruminococcus_bicirculans	Group	neurological	-0.777954	0.315981	0.0170385	Groupneurological	0.134323
s__Ruthenibacterium_lactatiformans	Group	neurological	-0.675965	0.262278	0.012722	Groupneurological	0.12375
s__Eubacterium_sp_CAG_274	Group	neurological	-0.673126	0.256601	0.0112979	Groupneurological	0.119994
s__Oscillibacter_sp_57_20	Group	neurological	-0.650698	0.267858	0.0184865	Groupneurological	0.136418
s__Asaccharobacter_celatus	Group	neurological	-0.644196	0.307103	0.0406313	Groupneurological	0.210077
s__Coprococcus_comes	Group	neurological	-0.633018	0.314644	0.0492362	Groupneurological	0.216621
s__Adlercreutzia_equolifaciens	Group	neurological	-0.610536	0.288494	0.0389458	Groupneurological	0.20836
s__Barnesiella_intestinihominis	Group	neurological	-0.499369	0.203857	0.017575	Groupneurological	0.134323
s__Eubacterium_ramulus	Group	neurological	-0.281655	0.129536	0.0340811	Groupneurological	0.196352
s__Lactococcus_petauri	Group	neurological	-0.202268	0.0887798	0.0266887	Groupneurological	0.173072
s__Actinomyces_massiliensis	Group	neurological	0.197772	0.0742599	0.0101784	Groupneurological	0.119994
s__Corynebacterium_durum	Group	neurological	0.217882	0.101478	0.036293	Groupneurological	0.199146
s__Olsenella_uli	Group	neurological	0.225962	0.110549	0.0458432	Groupneurological	0.216621
s__Actinomyces_sp_oral_taxon_414	Group	neurological	0.227042	0.0949757	0.0203412	Groupneurological	0.1451
s__Actinomyces_sp_oral_taxon_448	Group	neurological	0.243549	0.08251	0.00466753	Groupneurological	0.0713465
s__Romboutsia_ilealis	Group	neurological	0.336536	0.166907	0.0487529	Groupneurological	0.216621
s__Blautia_producta	Group	neurological	0.370863	0.158906	0.0233547	Groupneurological	0.157041
s__Clostridium_disporicum	Group	neurological	0.378618	0.185817	0.0465038	Groupneurological	0.216621
s__Streptococcus_infantis	Group	neurological	0.411776	0.19691	0.0412301	Groupneurological	0.210077
s__Actinobaculum_sp_oral_taxon_183	Group	neurological	0.42796	0.173649	0.0169329	Groupneurological	0.134323
s__Bifidobacterium_dentium	Group	neurological	0.454222	0.194811	0.0234827	Groupneurological	0.157041
s__Streptococcus_vestibularis	Group	neurological	0.483322	0.190073	0.0138951	Groupneurological	0.123898
s__Bacteroides_massiliensis	Group	neurological	0.486841	0.218295	0.0299118	Groupneurological	0.182889
s__Streptococcus_gordonii	Group	neurological	0.492097	0.18874	0.0117751	Groupneurological	0.119994
s__Rothia_mucilaginosa	Group	neurological	0.495078	0.179826	0.00802456	Groupneurological	0.107328
s__Streptococcus_anginosus_group	Group	neurological	0.498442	0.230281	0.0348662	Groupneurological	0.196352
s__Streptococcus_mutans	Group	neurological	0.500335	0.191513	0.0116157	Groupneurological	0.119994
s__Clostridium_bolteae	Group	neurological	0.518147	0.209	0.0163224	Groupneurological	0.134323
s__Actinomyces_odontolyticus	Group	neurological	0.568371	0.215246	0.0107998	Groupneurological	0.119994
s__Bacteroides_vulgatus	Group	neurological	0.572488	0.256674	0.0298972	Groupneurological	0.182889
s__Actinomyces_oris	Group	neurological	0.7552	0.196185	0.000315529	Groupneurological	0.0337616
s__Actinomyces_naeslundii	Group	neurological	0.773674	0.231727	0.00153013	Groupneurological	0.04283
s__Intestinibacter_bartlettii	Group	neurological	0.810932	0.318753	0.0138506	Groupneurological	0.123898
s__Actinomyces_sp_ICM47	Group	neurological	0.835689	0.269868	0.00310167	Groupneurological	0.0603416
s__Clostridium_innocuum	Group	neurological	0.940366	0.318147	0.00461584	Groupneurological	0.0713465
s__Ruminococcus_gnavus	Group	neurological	1.04178	0.314189	0.00163824	Groupneurological	0.04283
s__Erysipelatoclostridium_ramosum	Group	neurological	1.35706	0.405591	0.00149788	Groupneurological	0.04283

## Sheet: Respiratory
feature	metadata	value	coef	stderr	pval	name	qval
s__Faecalibacterium_prausnitzii	Group	respiratory	-1.30202	0.358202	0.000767897	Grouprespiratory	0.0250343
s__Bifidobacterium_pseudocatenulatum	Group	respiratory	-1.28976	0.449248	0.00644775	Grouprespiratory	0.0716039
s__Agathobaculum_butyriciproducens	Group	respiratory	-1.24894	0.284678	7.84e-05	Grouprespiratory	0.00827638
s__Roseburia_hominis	Group	respiratory	-1.20908	0.419293	0.00623626	Grouprespiratory	0.0716039
s__Collinsella_aerofaciens	Group	respiratory	-1.16133	0.521051	0.0313675	Grouprespiratory	0.183848
s__Anaerostipes_hadrus	Group	respiratory	-1.05886	0.318005	0.00184631	Grouprespiratory	0.0432858
s__Dialister_sp_CAG_357	Group	respiratory	-0.959558	0.462962	0.0445313	Grouprespiratory	0.218514
s__Eubacterium_ventriosum	Group	respiratory	-0.923174	0.243979	0.00049485	Grouprespiratory	0.0214433
s__Ruthenibacterium_lactatiformans	Group	respiratory	-0.888027	0.306789	0.00605862	Grouprespiratory	0.0716039
s__Alistipes_putredinis	Group	respiratory	-0.857391	0.330396	0.0130631	Grouprespiratory	0.102086
s__Firmicutes_bacterium_CAG_83	Group	respiratory	-0.789109	0.373768	0.0408942	Grouprespiratory	0.208933
s__Gemmiger_formicilis	Group	respiratory	-0.78721	0.318512	0.0176974	Grouprespiratory	0.12219
s__Eubacterium_sp_CAG_274	Group	respiratory	-0.770226	0.287718	0.0106325	Grouprespiratory	0.0919753
s__Oscillibacter_sp_57_20	Group	respiratory	-0.769347	0.288438	0.0108975	Grouprespiratory	0.0919753
s__Eubacterium_rectale	Group	respiratory	-0.741784	0.281116	0.0117113	Grouprespiratory	0.0950415
s__Adlercreutzia_equolifaciens	Group	respiratory	-0.734616	0.328417	0.030797	Grouprespiratory	0.183848
s__Clostridium_leptum	Group	respiratory	-0.687426	0.271392	0.0152319	Grouprespiratory	0.110825
s__Corynebacterium_durum	Group	respiratory	0.155113	0.0567441	0.00920689	Grouprespiratory	0.0919753
s__Actinomyces_sp_oral_taxon_414	Group	respiratory	0.197952	0.0807142	0.0185311	Grouprespiratory	0.12219
s__Streptococcus_cristatus	Group	respiratory	0.212778	0.100659	0.0406555	Grouprespiratory	0.208933
s__Actinomyces_sp_oral_taxon_897	Group	respiratory	0.258868	0.105262	0.0182299	Grouprespiratory	0.12219
s__Actinomyces_massiliensis	Group	respiratory	0.276883	0.0783514	0.00103031	Grouprespiratory	0.0271745
s__Pseudopropionibacterium_propionicum	Group	respiratory	0.309887	0.143374	0.0365558	Grouprespiratory	0.202981
s__Actinomyces_sp_oral_taxon_448	Group	respiratory	0.332686	0.0881309	0.000508134	Grouprespiratory	0.0214433
s__Propionibacterium_acidifaciens	Group	respiratory	0.333064	0.140307	0.0223713	Grouprespiratory	0.143041
s__Blautia_producta	Group	respiratory	0.338247	0.150614	0.0301709	Grouprespiratory	0.183848
s__Faecalicoccus_pleomorphus	Group	respiratory	0.358339	0.163227	0.033856	Grouprespiratory	0.193071
s__Olsenella_uli	Group	respiratory	0.36255	0.134673	0.0102339	Grouprespiratory	0.0919753
s__Actinomyces_graevenitzii	Group	respiratory	0.393483	0.187049	0.0415885	Grouprespiratory	0.208933
s__Bifidobacterium_dentium	Group	respiratory	0.42485	0.199585	0.0393374	Grouprespiratory	0.208933
s__Lactobacillus_mucosae	Group	respiratory	0.432653	0.16941	0.0144666	Grouprespiratory	0.109016
s__Streptococcus_infantis	Group	respiratory	0.452363	0.221512	0.0476034	Grouprespiratory	0.225935
s__Streptococcus_mutans	Group	respiratory	0.552881	0.185583	0.00483972	Grouprespiratory	0.0680787
s__Veillonella_parvula	Group	respiratory	0.568248	0.280414	0.0492559	Grouprespiratory	0.225935
s__Erysipelatoclostridium_ramosum	Group	respiratory	0.58032	0.285945	0.048934	Grouprespiratory	0.225935
s__Actinobaculum_sp_oral_taxon_183	Group	respiratory	0.593692	0.190637	0.00335844	Grouprespiratory	0.0507124
s__Clostridium_disporicum	Group	respiratory	0.608322	0.227774	0.0108031	Grouprespiratory	0.0919753
s__Rothia_mucilaginosa	Group	respiratory	0.617958	0.209618	0.00525882	Grouprespiratory	0.0693507
s__Streptococcus_gordonii	Group	respiratory	0.652435	0.203895	0.00265379	Grouprespiratory	0.0486289
s__Streptococcus_vestibularis	Group	respiratory	0.717336	0.219582	0.00220269	Grouprespiratory	0.0464767
s__Streptococcus_anginosus_group	Group	respiratory	0.799696	0.256843	0.0033648	Grouprespiratory	0.0507124
s__Actinomyces_odontolyticus	Group	respiratory	0.848774	0.235244	0.000830523	Grouprespiratory	0.0250343
s__Actinomyces_sp_ICM47	Group	respiratory	0.90598	0.284459	0.00276562	Grouprespiratory	0.0486289
s__Actinomyces_oris	Group	respiratory	0.917444	0.208871	7.72e-05	Grouprespiratory	0.00827638
s__Intestinibacter_bartlettii	Group	respiratory	1.00976	0.362557	0.00806336	Grouprespiratory	0.0850685
s__Actinomyces_naeslundii	Group	respiratory	1.03597	0.253593	0.000199456	Grouprespiratory	0.0140284

## Sheet: Summary
no	species	Fatigue	Gastrointestinal	Neurological	Respiratory	Musculoskeletal	HairLoss
1	Actinomyces_odontolyticus	1	1	1	1	1	1
2	Agathobaculum_butyriciproducens	1	1	1	1	1	1
3	Faecalibacterium_prausnitzii	1	1	1	1	1	1
4	Gemmiger_formicilis	1	1	1	1	1	1
5	Intestinibacter_bartlettii	1	1	1	1	1	1
6	Roseburia_hominis	1	1	1	1	1	1
7	Actinomyces_naeslundii	1	1	1	1	1	0
8	Erysipelatoclostridium_ramosum	1	1	1	1	1	0
9	Oscillibacter_sp_57_20	1	1	1	1	1	0
10	Actinobaculum_sp_oral_taxon_183	1	1	1	1	0	0
11	Bifidobacterium_pseudocatenulatum	1	1	0	1	0	0
12	Clostridium_leptum	1	1	0	1	0	0
13	Collinsella_aerofaciens	1	1	0	1	0	0
14	Lactobacillus_salivarius	1	1	0	0	0	0
15	Actinomyces_oris	1	0	1	1	1	1
16	Actinomyces_sp_oral_taxon_414	1	0	1	1	1	1
17	Anaerostipes_hadrus	1	0	1	1	1	1
18	Bifidobacterium_dentium	1	0	1	1	1	1
19	Dialister_sp_CAG_357	1	0	1	1	1	1
20	Eubacterium_rectale	1	0	1	1	1	1
21	Eubacterium_ventriosum	1	0	1	1	1	1
22	Olsenella_uli	1	0	1	1	1	1
23	Streptococcus_anginosus_group	1	0	1	1	1	1
24	Actinomyces_sp_oral_taxon_448	1	0	1	1	1	0
25	Eubacterium_sp_CAG_274	1	0	1	1	1	0
26	Rothia_mucilaginosa	1	0	1	1	1	0
27	Streptococcus_infantis	1	0	1	1	1	0
28	Streptococcus_vestibularis	1	0	1	1	1	0
29	Actinomyces_massiliensis	1	0	1	1	0	0
30	Corynebacterium_durum	1	0	1	1	0	0
31	Firmicutes_bacterium_CAG_83	1	0	1	1	0	0
32	Ruthenibacterium_lactatiformans	1	0	1	1	0	0
33	Streptococcus_gordonii	1	0	1	1	0	0
34	Coprococcus_comes	1	0	1	0	0	0
35	Faecalicoccus_pleomorphus	1	0	0	1	1	1
36	Alistipes_putredinis	1	0	0	1	1	0
37	Actinomyces_sp_oral_taxon_897	1	0	0	1	0	0
38	Propionibacterium_acidifaciens	1	0	0	1	0	0
39	Dorea_formicigenerans	1	0	0	0	1	1
40	Lactobacillus_mucosae	1	0	0	0	1	0
41	Anaerostipes_caccae	1	0	0	0	0	0
42	Eubacterium_hallii	1	0	0	0	0	0
43	Fusicatenibacter_saccharivorans	1	0	0	0	0	0
44	Megasphaera_micronuciformis	1	0	0	0	0	0
45	Streptococcus_parasanguinis	1	0	0	0	0	0
46	Adlercreutzia_equolifaciens	0	1	1	1	1	0
47	Clostridium_innocuum	0	1	1	0	1	1
48	Asaccharobacter_celatus	0	1	1	0	1	0
49	Ruminococcus_gnavus	0	1	1	0	1	0
50	Eisenbergiella_tayi	0	1	0	0	1	1
51	Eubacterium_limosum	0	1	0	0	1	1
52	Blautia_sp_CAG_257	0	1	0	0	0	0
53	Ruminococcus_torques	0	1	0	0	0	0
54	Blautia_producta	0	0	1	1	1	0
55	Streptococcus_mutans	0	0	1	1	1	0
56	Actinomyces_sp_ICM47	0	0	1	1	0	0
57	Clostridium_disporicum	0	0	1	1	0	0
58	Clostridium_bolteae	0	0	1	0	1	1
59	Bacteroides_massiliensis	0	0	1	0	0	0
60	Bacteroides_vulgatus	0	0	1	0	0	0
61	Barnesiella_intestinihominis	0	0	1	0	0	0
62	Eubacterium_ramulus	0	0	1	0	0	0
63	Lactococcus_petauri	0	0	1	0	0	0
64	Romboutsia_ilealis	0	0	1	0	0	0
65	Ruminococcus_bicirculans	0	0	1	0	0	0
66	Actinomyces_graevenitzii	0	0	0	1	0	0
67	Pseudopropionibacterium_propionicum	0	0	0	1	0	0
68	Streptococcus_cristatus	0	0	0	1	0	0
69	Veillonella_parvula	0	0	0	1	0	0
70	Hungatella_hathewayi	0	0	0	0	1	1
71	Roseburia_inulinivorans	0	0	0	0	1	1
72	Ruminococcus_lactaris	0	0	0	0	1	1
73	Bacteroides_thetaiotaomicron	0	0	0	0	1	0
74	Eubacterium_callanderi	0	0	0	0	1	0
75	Haemophilus_parainfluenzae	0	0	0	0	1	0
76	Eisenbergiella_massiliensis	0	0	0	0	0	1
77	Faecalitalea_cylindroides	0	0	0	0	0	1
78	Firmicutes_bacterium_CAG_94	0	0	0	0	0	1
79	Lactonifactor_longoviformis	0	0	0	0	0	1
80	Massiliomicrobiota_timonensis	0	0	0	0	0	1
81	Pseudoflavonifractor_sp_An184	0	0	0	0	0	1
